# Supplementary material for: The Association Between Impaired Awareness and Depression, Anxiety, and Apathy in Mild to Moderate Alzheimer's Disease: A Systematic Review
Source: Frontiers journal article supplement (doi:10.3389/fpsyt.2021.633081), 2021-02-04
Supplement: Data_Sheet_1.PDF [file Data_Sheet_1.PDF]

## Appendix 1.a The Newcastle-Ottawa Quality Assessment Scale for case control studies.

Note: A study can be awarded a maximum of one star for each numbered item within the Selection and Exposure categories. A maximum of two stars can be given for Comparability.

### Selection

- 1) Is the case definition adequate?  
a) yes, with independent validation Ø  
b) yes, eg record linkage or based on self reports c) no description
- 2) Representativeness of the cases  
a) consecutive or obviously representative series of cases Ø  
b) potential for selection biases or not stated
- 3) Selection of Controls  
a) community controls Ø b) hospital controls  
c) no description
- 4) Definition of Controls  
a) no history of disease (endpoint) Ø  
b) no description of source

### Comparability

- 1) Comparability of cases and controls on the basis of the design or analysis  
a) study controls for \_\_\_\_\_ (Select the most important factor.) Ø  
b) study controls for any additional factor Ø (This criteria could be modified to indicate specific control for a second important factor.)

### Exposure

- 1) Ascertainment of exposure  
a) secure record (eg surgical records) Ø  
b) structured interview where blind to case/control status Ø  
c) interview not blinded to case/control status  
d) written self report or medical record only  
e) no description
- 2) Same method of ascertainment for cases and controls  
a) yes Ø  
b) no
- 3) Non-Response rate  
a) same rate for both groups Ø  
b) non respondents described  
c) rate different and no designation

## Appendix 1. b The Newcastle-Ottawa Quality Assessment Scale for cohort studies.

Note: A study can be awarded a maximum of one star for each numbered item within the Selection and Outcome categories. A maximum of two stars can be given for Comparability

### Selection

- 1) Representativeness of the exposed cohort  
a) truly representative of the average \_\_\_\_\_ (describe) in the community Ø  
b) somewhat representative of the average \_\_\_\_\_ in the community Ø  
c) selected group of users eg nurses, volunteers  
d) no description of the derivation of the cohort
- 2) Selection of the non exposed cohort  
a) drawn from the same community as the exposed cohort Ø  
b) drawn from a different source  
c) no description of the derivation of the non exposed cohort
- 3) Ascertainment of exposure  
a) secure record (eg surgical records) Ø  
b) structured interview Ø  
c) written self report  
d) no description
- 4) Demonstration that outcome of interest was not present at start of study  
a) yes Ø  
b) no

### Comparability

- 1) Comparability of cohorts on the basis of the design or analysis  
a) study controls for \_\_\_\_\_ (select the most important factor) Ø  
b) study controls for any additional factor Ø (This criteria could be modified to indicate specific control for a second important factor.)

#### Outcome

- 1) Assessment of outcome
  - a) independent blind assessment Ø
  - b) record linkage Ø
  - c) self report
  - d) no description
- 2) Was follow-up long enough for outcomes to occur
  - a) yes (select an adequate follow up period for outcome of interest) Ø
  - b) no
- 3) Adequacy of follow up of cohorts
  - a) complete follow up - all subjects accounted for Ø
  - b) subjects lost to follow up unlikely to introduce bias - small number lost - > \_\_\_\_ % (select an adequate %) follow up, or description provided of those lost) Ø
  - c) follow up rate < \_\_\_\_ % (select an adequate %) and no description of those lost
  - d) no statement

### **Appendix 1. c** The Newcastle-Ottawa Quality Assessment Scale for cross-sectional studies. by PA Modesti et al.

#### Selection: (Maximum 5 stars)

- 1) Representativeness of the sample:
  - a) Truly representative of the average in the target population. \* (all subjects or random sampling)
  - b) Somewhat representative of the average in the target population. \* (non- random sampling)
  - c) Selected group of users.
  - d) No description of the sampling strategy.
- 2) Sample size:
  - a) Justified and satisfactory. \*
  - b) Not justified.
- 3) Non-respondents:
  - a) Comparability between respondents and non-respondents characteristics is established, and the response rate is satisfactory. \*
  - b) The response rate is unsatisfactory, or the comparability between respondents and non-respondents is unsatisfactory.
  - c) No description of the response rate or the characteristics of the responders and the non-responders.
- 4) Ascertainment of the exposure (risk factor):
  - a) Validated measurement tool. \*\*
  - b) Non-validated measurement tool, but the tool is available or described.\*
  - c) No description of the measurement tool.

#### Comparability: (Maximum 2 stars)

- 1) The subjects in different outcome groups are comparable, based on the study design or analysis. Confounding factors are controlled.
  - a) The study controls for the most important factor (select one). \*
  - b) The study control for any additional factor. \*

#### Outcome: (Maximum 3 stars)

- 1) Assessment of the outcome:
  - a) Independent blind assessment. \*\*
  - b) Record linkage. \*\*
  - c) Self report. \*
  - d) No description.
- 2) Statistical test:
  - a) The statistical test used to analyze the data is clearly described and appropriate, and the measurement of the association is presented, including confidence intervals and the probability level (p value). \*
  - b) The statistical test is not appropriate, not described or incomplete.
